# Supplementary material
Source: Springer Nature journal article supplement (https://www.springermedizin.de/resource/supplementary/13058_2006_1640_MOESM10_ESM.pdf/9699584)
Supplement: MOESM10 [file 9699584]

**Table 2.** Cox regression analysis for breast cancer death for all patients (n=179-200)

|                                     | (a) Univariate analysis |               |          | (b) Multivariate analysis |               |          |
|-------------------------------------|-------------------------|---------------|----------|---------------------------|---------------|----------|
|                                     | <i>RR</i>               | <i>95% CI</i> | <i>P</i> | <i>RR</i>                 | <i>95% CI</i> | <i>P</i> |
| Age, ≥55 years vs <55 years         | 0.86                    | 0.51-1.44     | 0.57     |                           |               |          |
| Tumor type (overall effect)         |                         |               | 0.14     |                           |               |          |
| Lobular (vs ductal)                 | 0.56                    | 0.30-1.06     | 0.074    |                           |               |          |
| Other (vs ductal)                   | 0.66                    | 0.26-1.67     | 0.38     |                           |               |          |
| Tumor size (overall effect)         |                         |               | 0.001    |                           |               | 0.002    |
| T2 (vs T1)                          | 2.22                    | 1.17-4.20     | 0.014    | 1.94                      | 0.99-3.82     | 0.054    |
| T3-T4 (vs T1)                       | 4.17                    | 1.93-9.01     | 0.0003   | 4.44                      | 1.95-10.1     | 0.0004   |
| Lymph node status (overall effect)  |                         |               | 0.035    |                           |               | 0.027    |
| pN1 (vs pN0)                        | 1.34                    | 0.69-2.62     | 0.39     | 1.09                      | 0.54-2.21     | 0.81     |
| pN2-pN3 (vs pN0)                    | 3.42                    | 1.82-6.41     | 0.0001   | 2.73                      | 1.41-5.30     | 0.003    |
| Other* (vs pN0)                     | 1.69                    | 0.77-3.67     | 0.19     | 1.28                      | 0.51-3.20     | 0.60     |
| Histological grade (overall effect) |                         |               | 0.47     |                           |               |          |
| G2 (vs G1)                          | 0.99                    | 0.39-2.50     | 0.98     |                           |               |          |
| G3 (vs G1)                          | 1.43                    | 0.52-3.90     | 0.49     |                           |               |          |
| TP53, mutation (vs wild type)       | 4.51                    | 2.69-7.56     | <0.0001  | 5.24                      | 3.03-9.07     | <0.0001  |
| ER, positive (vs negative)          | 0.72                    | 0.43-1.22     | 0.23     |                           |               |          |
| PR, positive (vs negative)          | 0.82                    | 0.49-1.36     | 0.44     |                           |               |          |

*RR*: relative risk (hazard ratio)

*95% CI*: 95% confidence interval for relative risk

*P*: P-value for the hypothesis of no effect

\*Lymph nodes not removed
